# Supplementary material for: Sustainable catalysts for efficient triazole synthesis: an immobilized triazine-based copper-NNN pincer complex on TiO2
Source: Royal Society of Chemistry journal article supplement (doi:10.1039/d3dt02118a), 2023-01-01
Supplement: d3dt02118a1.pdf [file d3dt02118a1.pdf]

## **Sustainable catalyst for efficient triazole synthesis: immobilized triazine-based copper-NNN pincer complex on TiO<sub>2</sub>**

Mitra Esfandiari,<sup>a,b</sup> Gholamhossein Mohammadnezhad,<sup>\*a</sup> Oluseun Akintola,<sup>b</sup> Felix Otto,<sup>c</sup>  
Torsten Fritz,<sup>c</sup> Winfried Plass<sup>\*b</sup>

<sup>a</sup> *Department of Chemistry, Isfahan University of Technology, Isfahan 84156-83111, Islamic Republic of Iran*

<sup>b</sup> *Institut für Anorganische und Analytische Chemie, Friedrich-Schiller-Universität Jena, Humboldtstraße 8, 07743 Jena, Germany*

<sup>c</sup> *Institute of Solid State Physics, Friedrich Schiller University Jena, Helmholtzweg 5, 07743 Jena, Germany*

### **Electronic Supplementary Information (ESI)**

## Characterization of triazoles derivates:

**1-benzyl-4-phenyl-1H-1,2,3-triazole (3a):** White solid (crystal). Mp: 127-128 °C.  $^1\text{H}$  NMR (400 MHz,  $\text{CDCl}_3$ )  $\delta$  = 5.57 (s, 2 H), 7.23–7.42 (m, 8 H), 7.66 (s, 1 H), 7.80 (d,  $J$  = 7.2, 2 H) ppm.  $^{13}\text{C}$  NMR (100 MHz,  $\text{CDCl}_3$ )  $\delta$  = 54.2, 119.5, 125.7, 128.1, 128.2, 128.8, 129.2, 130.5, 134.6, 148.3 ppm. FT-IR (KBr):  $\tilde{\nu}$  = 3141, 1494, 1469, 1449, 1359, 1224, 1075, 1049, 766, 693  $\text{cm}^{-1}$ .

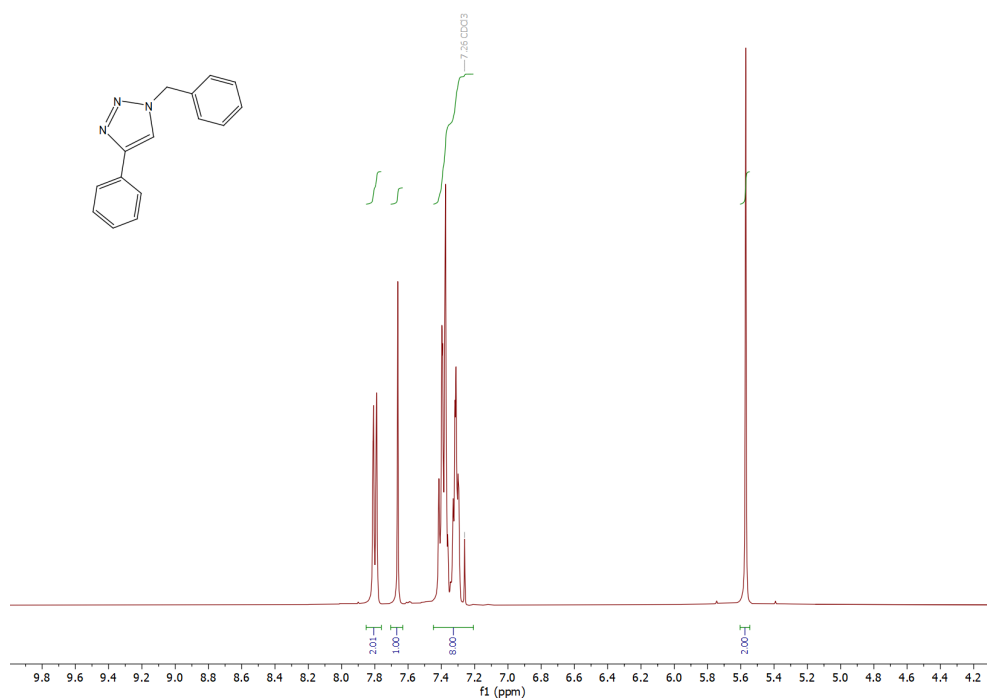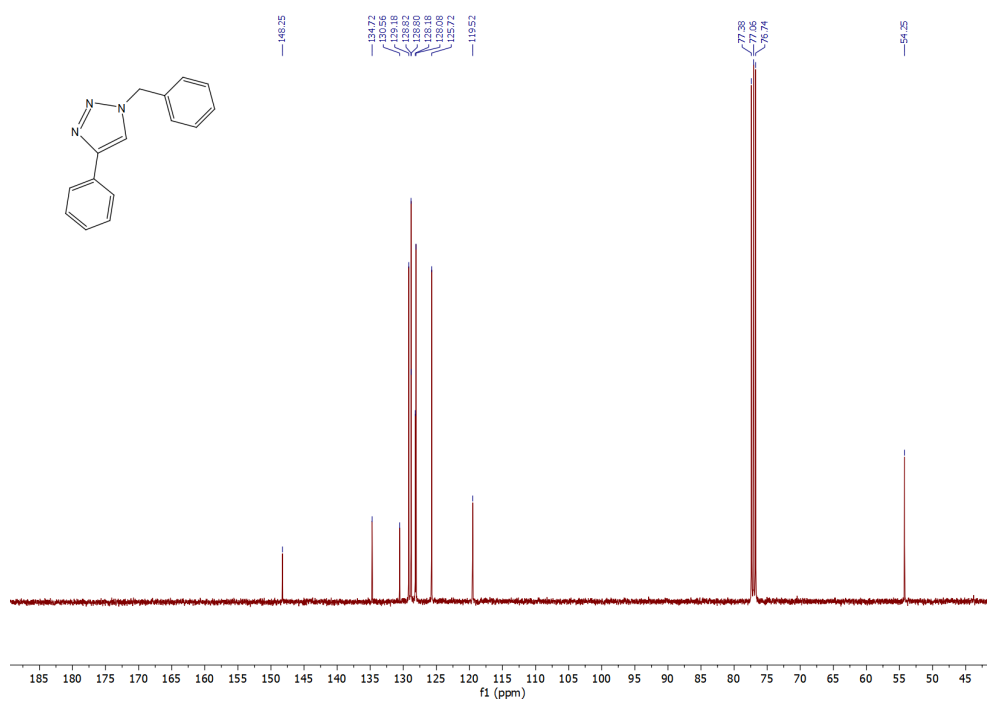

**1-(2-nitrobenzyl)-4-phenyl-1H-1,2,3-triazole (3b):** Yellow solid. Mp: 145–147 °C.  $^1\text{H}$  NMR (400 MHz,  $\text{CDCl}_3$ ):  $\delta$  = 5.98 (s, 2 H), 7.14 (d,  $J$  = 7.5 Hz, 1 H), 7.33 (t,  $J$  = 7.5 Hz, 1 H), 7.42 (dd,  $J_{\text{av}}$  = 7.5 Hz, 2 H), 7.52 (dd,  $J_{\text{av}}$  = 7.7 Hz, 1 H), 7.61 (dd,  $J_{\text{av}}$  = 7.6 Hz, 1 H), 7.87 (d,  $J$  = 7.1 Hz, 2 H), 7.95 (s, 1 H), 8.15 (d,  $J$  = 8.1 Hz, 1 H) ppm.  $^{13}\text{C}$  NMR (100 MHz,  $\text{CDCl}_3$ ):  $\delta$  = 50.9, 120.7, 125.4, 125.8, 128.4, 128.9, 129.7, 130.2, 130.4, 130.7, 134.4, 147.5 ppm. FT-IR (KBr):  $\tilde{\nu}$  = 3091, 1604, 1527, 1463, 1340, 1222, 1205, 1074, 1049, 977, 863, 791, 762, 730, 687, 600  $\text{cm}^{-1}$ .

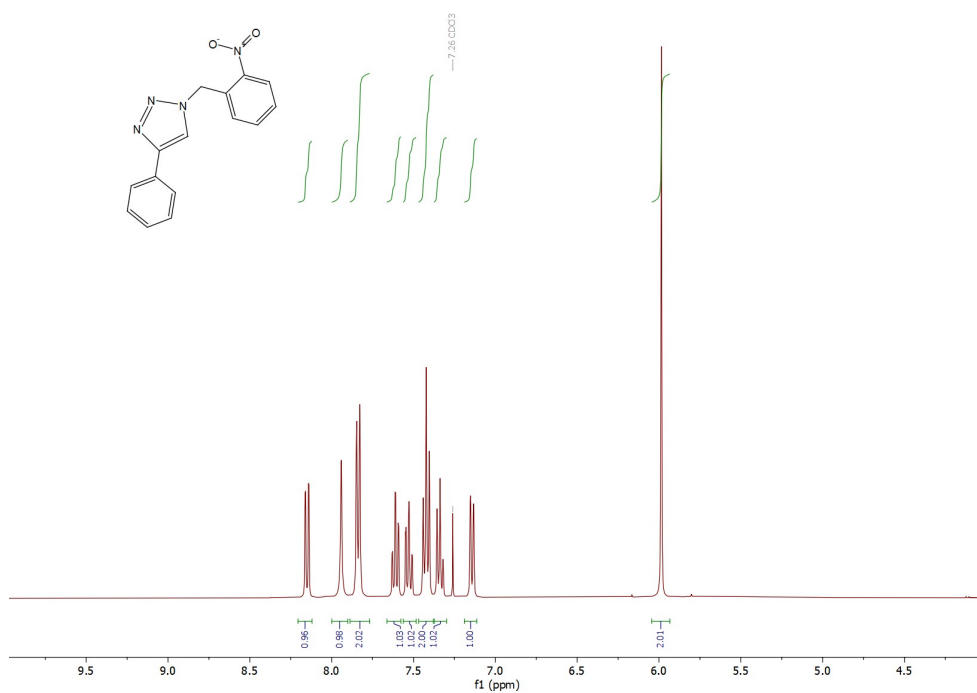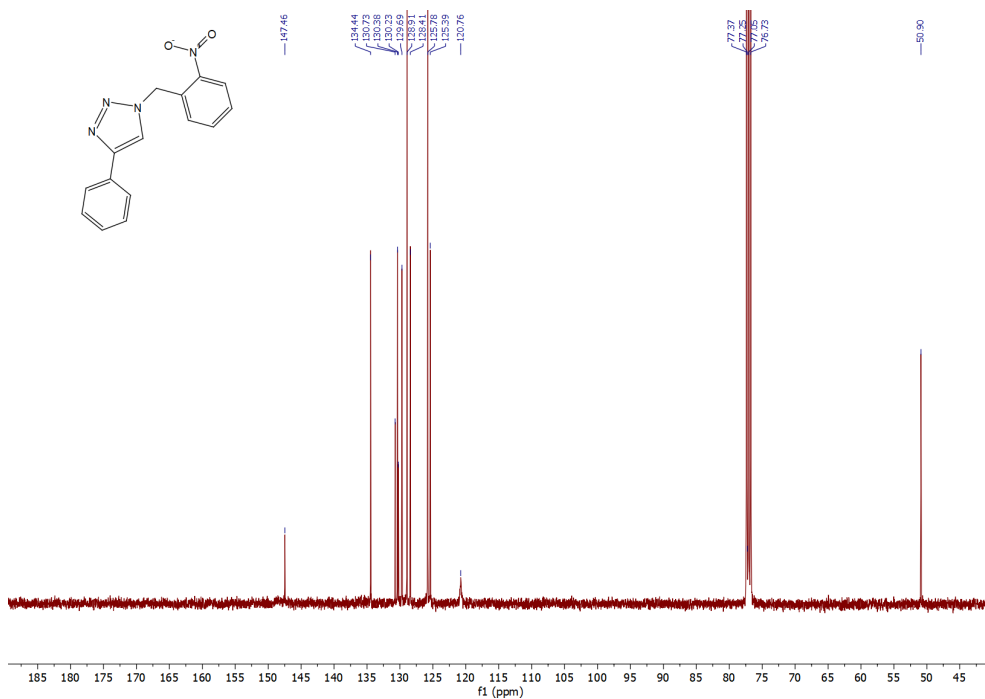

**1-(4-nitrobenzyl)-4-phenyl-1H-1,2,3-triazole (3c):** Yellow solid. Mp: 156–158 °C,  $^1\text{H}$  NMR (400 MHz,  $\text{CDCl}_3$ ):  $\delta$  = 5.70 (s, 2 H), 7.30–7.46 (m, 1 H), 7.40–7.46 (m, 4 H), 7.76 (s, 1 H), 7.80 (d,  $J$  = 7.2 Hz, 2 H), 8.22 (d,  $J$  = 8.7 Hz, 2 H) ppm.  $^{13}\text{C}$  NMR (100 MHz,  $\text{CDCl}_3$ ):  $\delta$  = 53.2, 119.8, 124.4, 125.8, 128.5, 128.6, 128.9, 130.1, 141.7, 148.1 ppm. FT-IR (KBr):  $\tilde{\nu}$  = 3127, 1609, 1516, 1348, 1073, 861, 765, 514  $\text{cm}^{-1}$ .

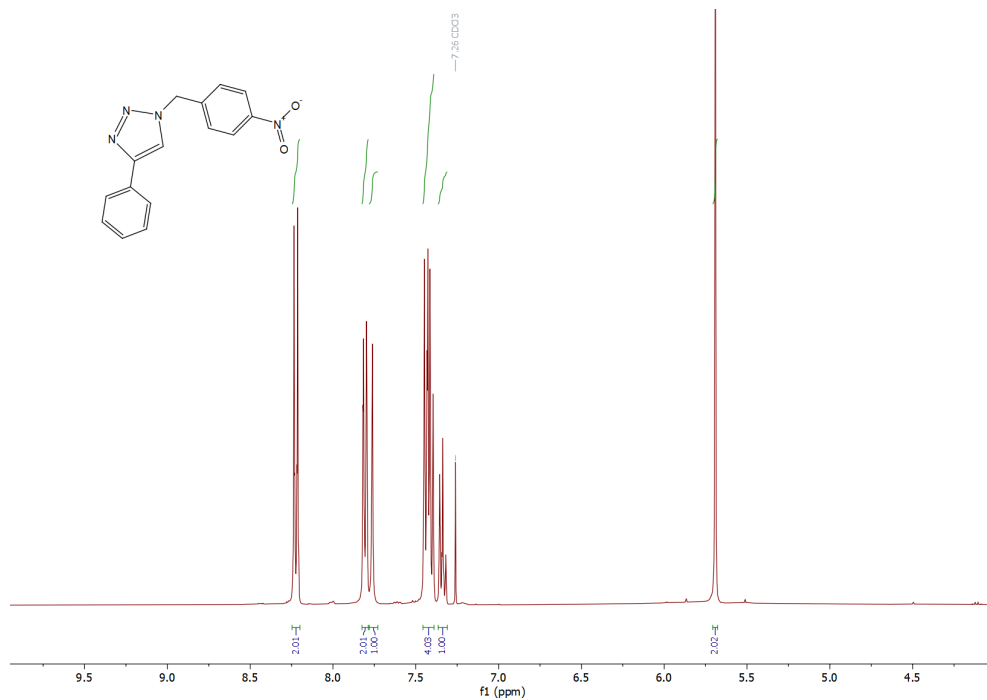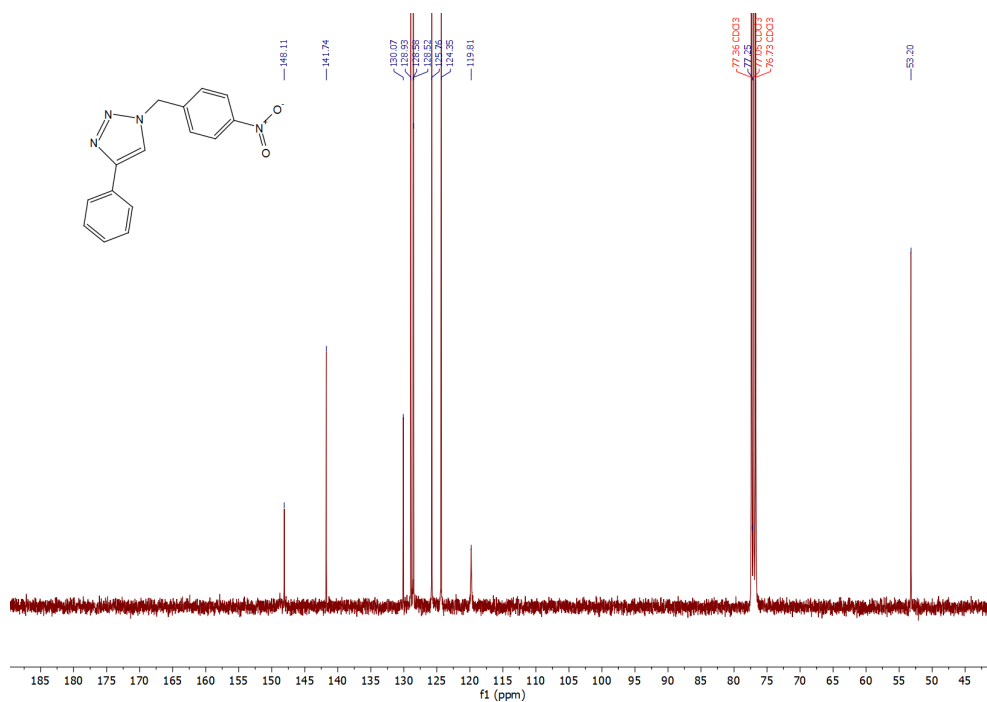

**1-(3-bromobenzyl)-4-phenyl-1H-1,2,3-triazole (3d):** Pale yellow solid. Mp: 88–92 °C;  $^1\text{H}$  NMR (400 MHz,  $\text{CDCl}_3$ ):  $\delta$  = 5.56 (s, 2 H), 7.21–7.55 (m, 7 H), 7.76 (s, 1 H), 7.82 (d,  $J$  = 7.3, 2 H) ppm.  $^{13}\text{C}$  NMR (100 MHz,  $\text{CDCl}_3$ ):  $\delta$  = 53.5, 119.9, 123.1, 125.7, 126.6, 128.3, 128.9, 130.4, 130.7, 131.1, 132.0, 136.9 ppm. FT-IR (KBr):  $\tilde{\nu}$  = 3084, 1460, 1432, 1222, 1046, 766, 693  $\text{cm}^{-1}$ .

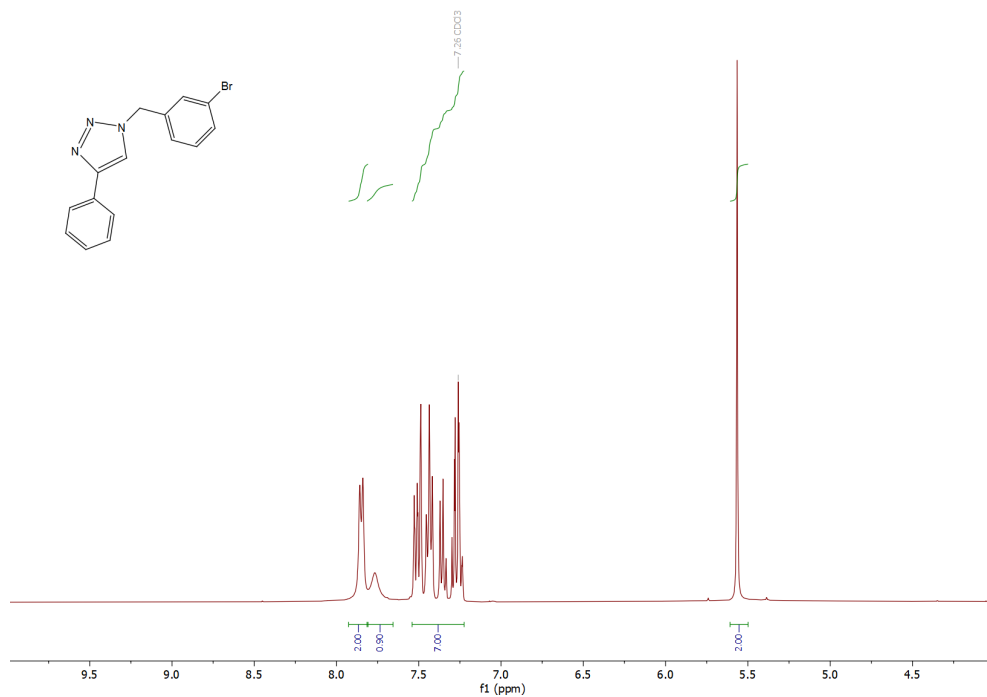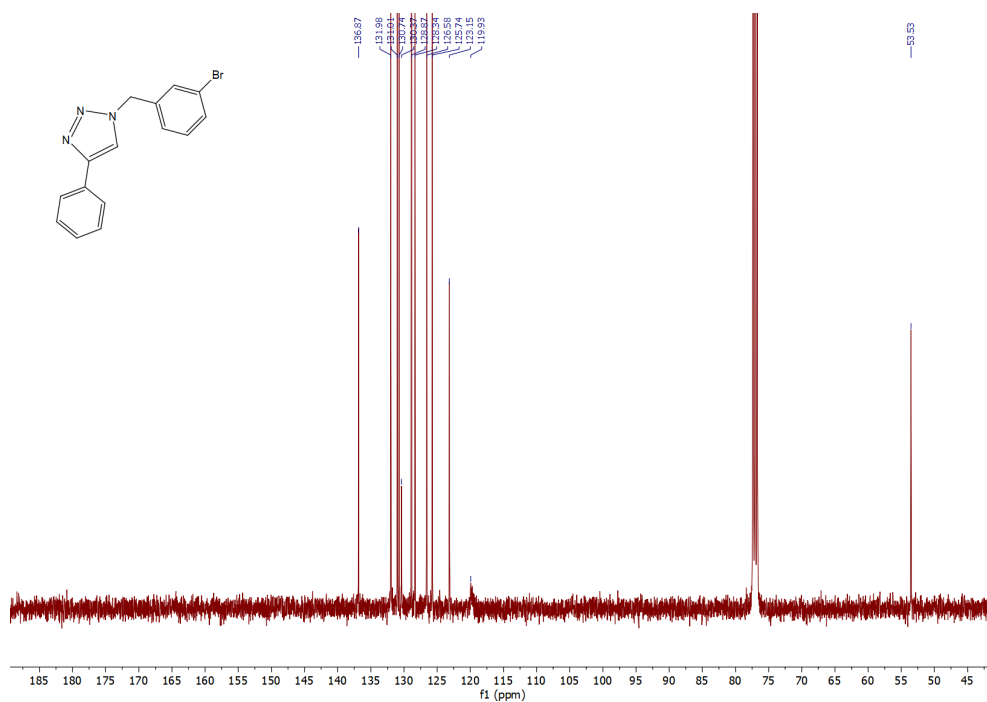

**1-(4-Bromophenyl)-2-(4-phenyl-1H-1,2,3-triazol-1-yl)-ethanone (3e):** Orange solid. Mp: 178–180 °C.  $^1\text{H}$  NMR (400 MHz,  $\text{CDCl}_3$ ):  $\delta$  = 5.8x (s, 2 H), 7.34 (t,  $J$  = 7.2 Hz, 1 H), 7.44 (dd,  $J_{\text{av}}$  = 7.6 Hz, 2 H), 7.73 (d,  $J$  = 8.0 Hz, 2 H), 7.82–7.92 (m, 4 H), 7.93 (s, 1 H) ppm.  $^{13}\text{C}$  NMR (100 MHz,  $\text{CDCl}_3$ ):  $\delta$  = 55.4, 121.4, 125.9, 128.3, 128.9, 129.6, 130.2, 130.4, 132.6, 148.4, 189.4 ppm. FT-IR (KBr):  $\tilde{\nu}$  = 3142, 2936, 1709, 1582, 1229, 847, 762, 562  $\text{cm}^{-1}$ .

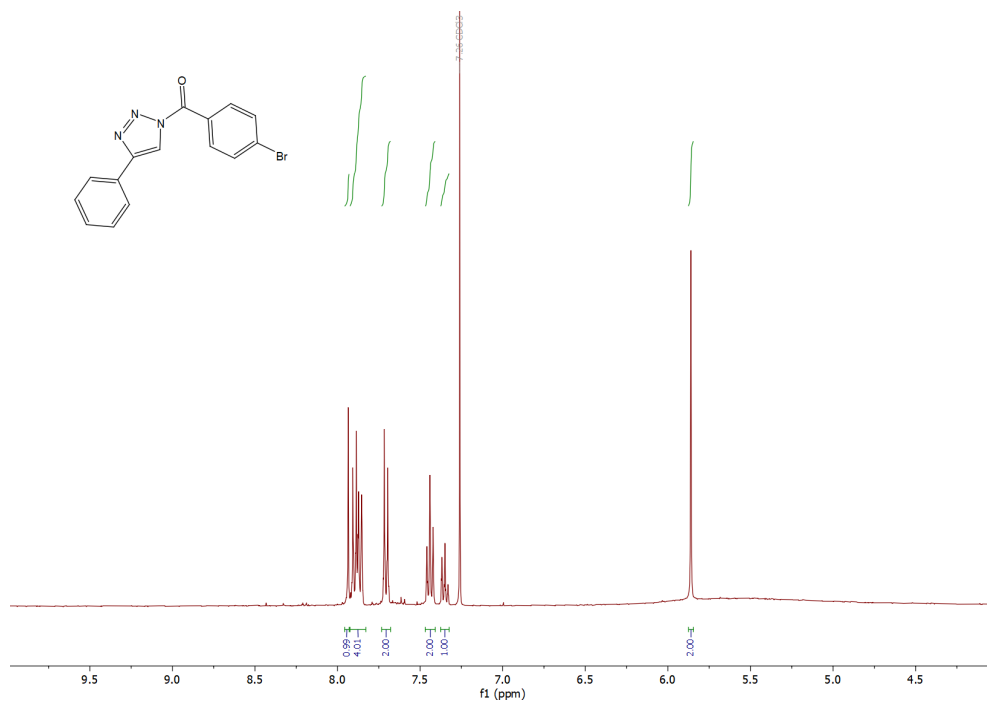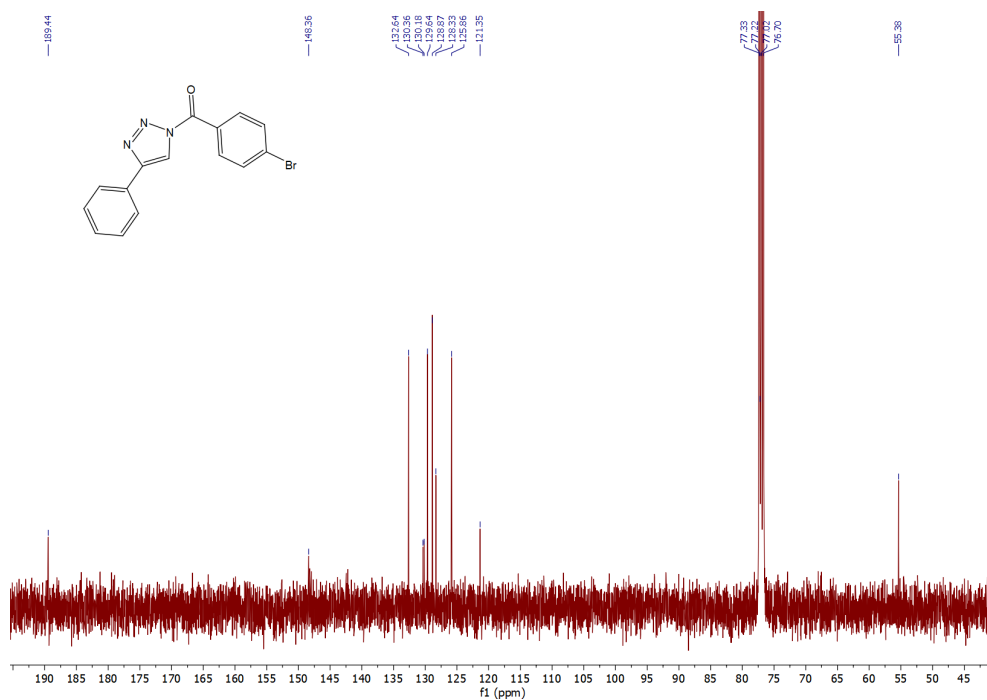

**(Allyl)-2-(4-phenyl-1H-1,2,3-triazole (3f):** White solid. Mp: 56–57 °C.  $^1\text{H}$  NMR (400 MHz,  $\text{CDCl}_3$ ):  $\delta$  = 4.95–5.06 (m, 2 H), 5.27–5.42 (m, 2 H), 5.98–6.10 (m, 1 H), 7.30–7.47 (m, 3 H), 7.71–7.94 (m, 3 H) ppm.  $^{13}\text{C}$  NMR (100 MHz,  $\text{CDCl}_3$ ):  $\delta$  = 52.8, 120.3, 125.7, 128.2, 128.9, 130.6, 131.3, 147.9 ppm. FT-IR (KBr):  $\tilde{\nu}$  = 3130, 2972, 1645, 1449, 1240, 1015, 995, 908  $\text{cm}^{-1}$ .

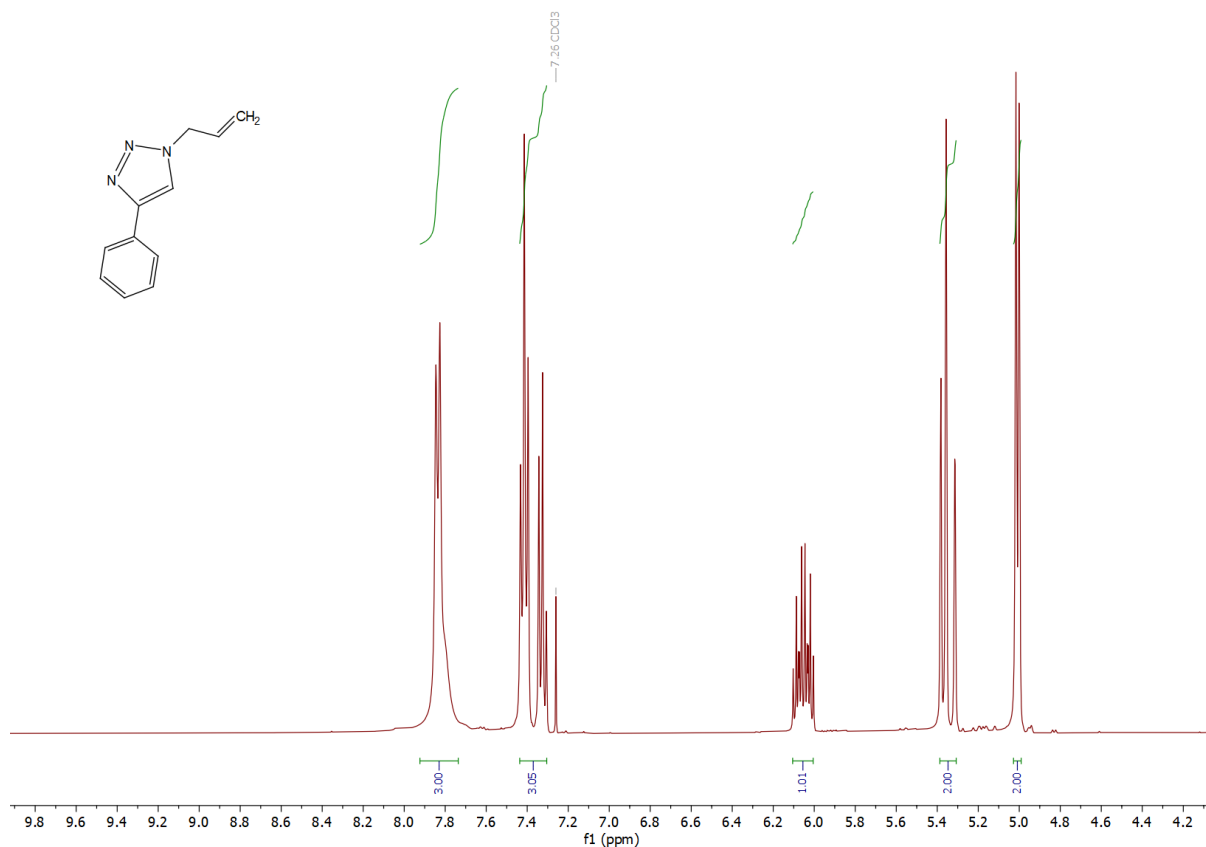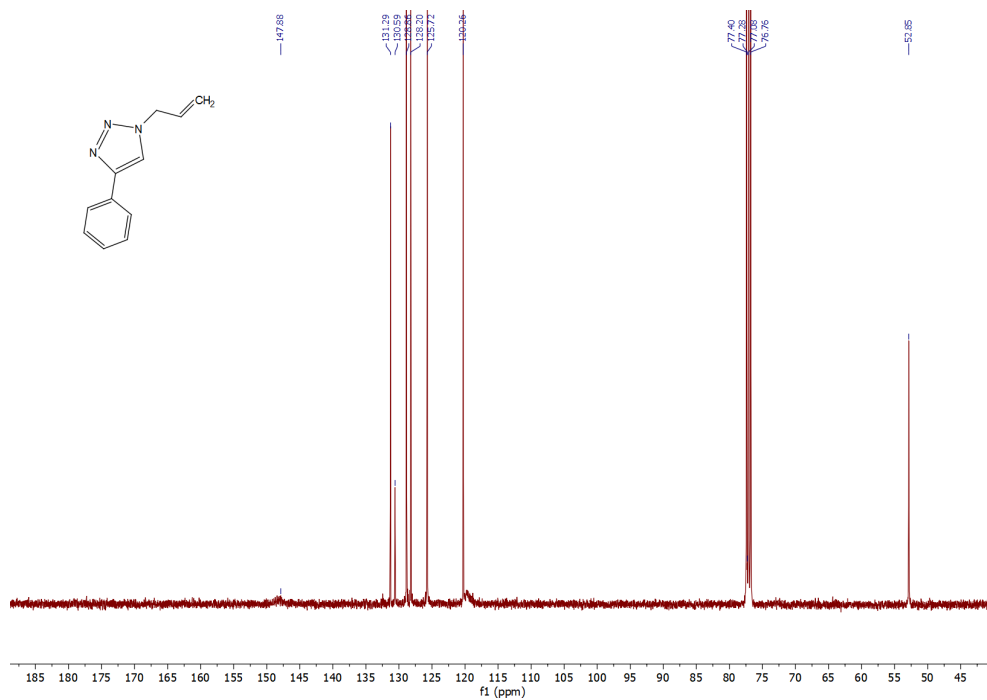

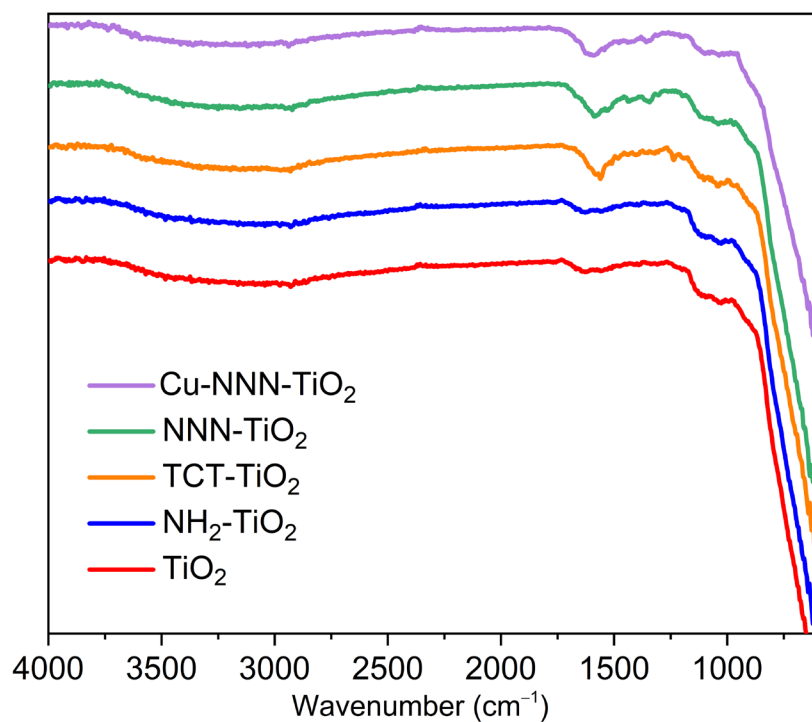

**Fig. S1** FTIR spectra of the products of all steps in the immobilization of the NNN-pincer complex on TiO<sub>2</sub>.

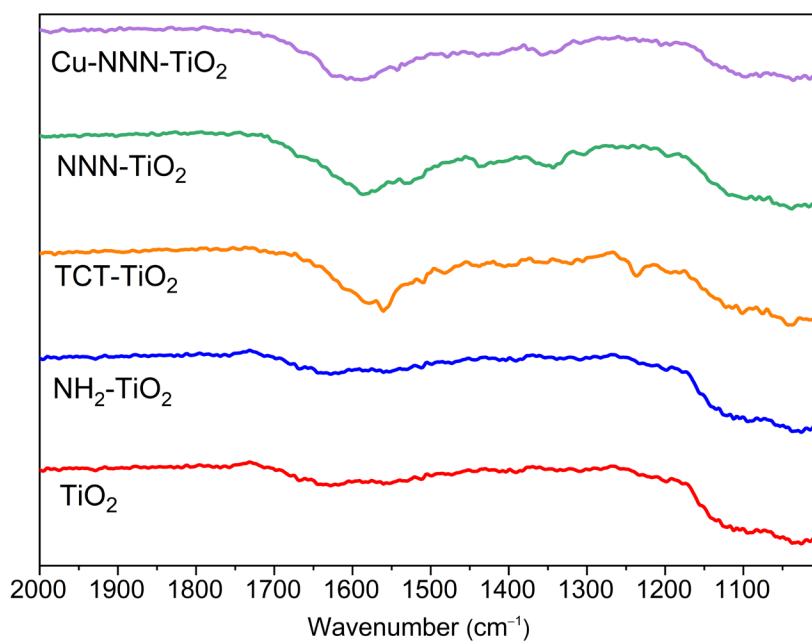

**Fig. S2** FTIR spectra of the products of all steps in the immobilization of the NNN-pincer complex on TiO<sub>2</sub> in the range 1000–2000 cm<sup>-1</sup>.



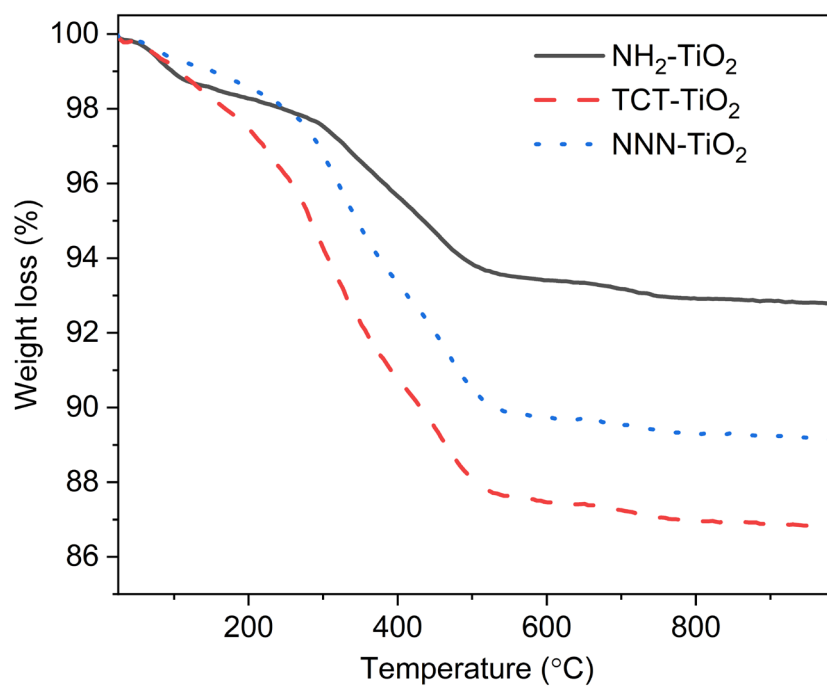

**Fig. S3** TGA curves of the products of all steps in the immobilization of the NNN-pincer complex on TiO<sub>2</sub>.

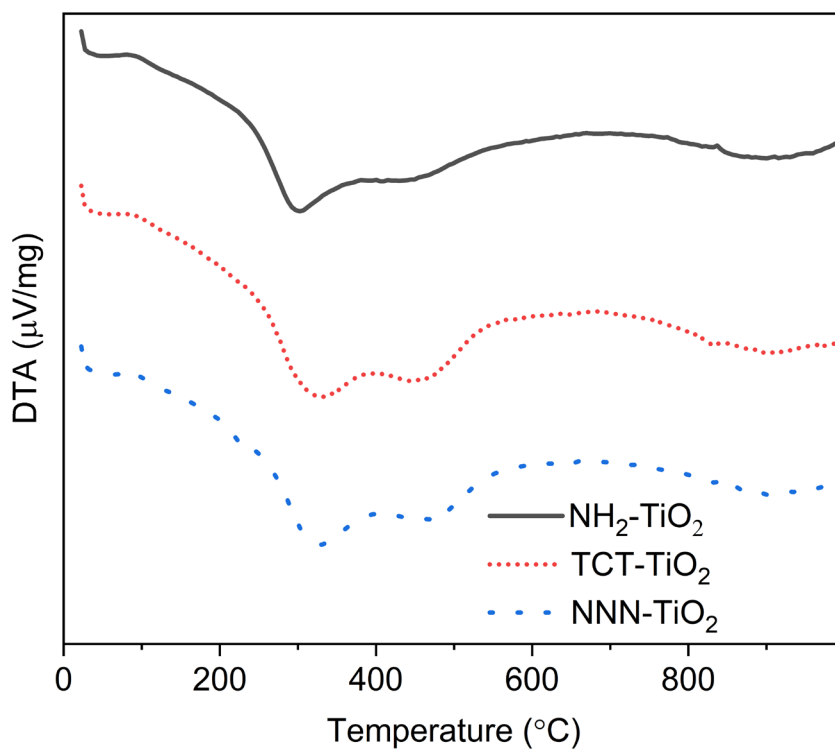

**Fig. S4** Differential thermal analysis (DTA) curves of the products of all steps in the immobilization of the NNN-pincer complex on TiO<sub>2</sub>.

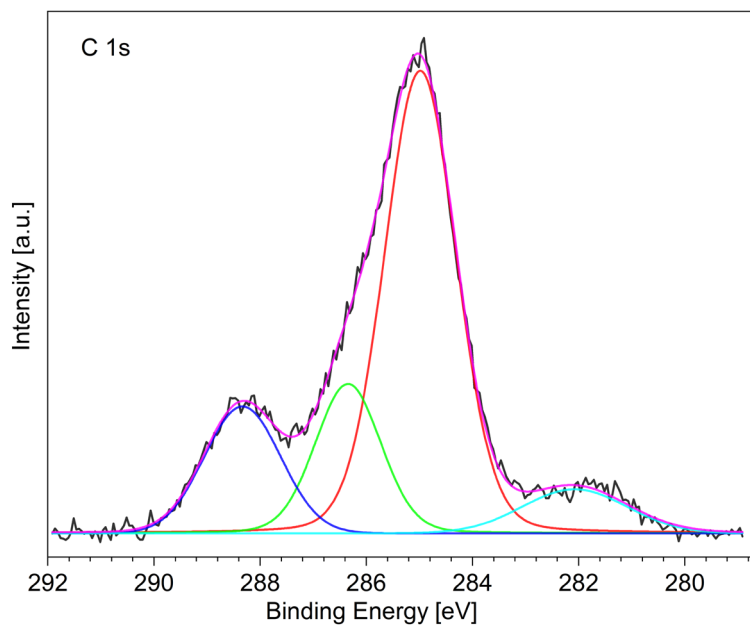

**Fig. S5** High-resolution XPS of C 1s for Cu-NNN-TiO<sub>2</sub> (Black curve: measured spectrum; colored curves: fitted peaks); the peak at around 282 eV is considered an artifact of the measurement.

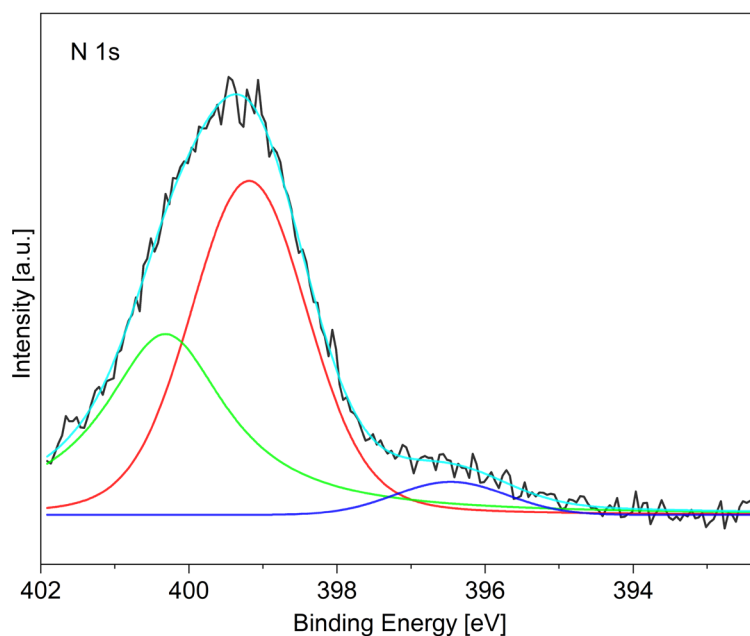

**Fig. S6** High-resolution XPS spectra of N 1s for Cu-NNN-TiO<sub>2</sub> (Black curve: measured spectrum; colored curves: fitted peaks).

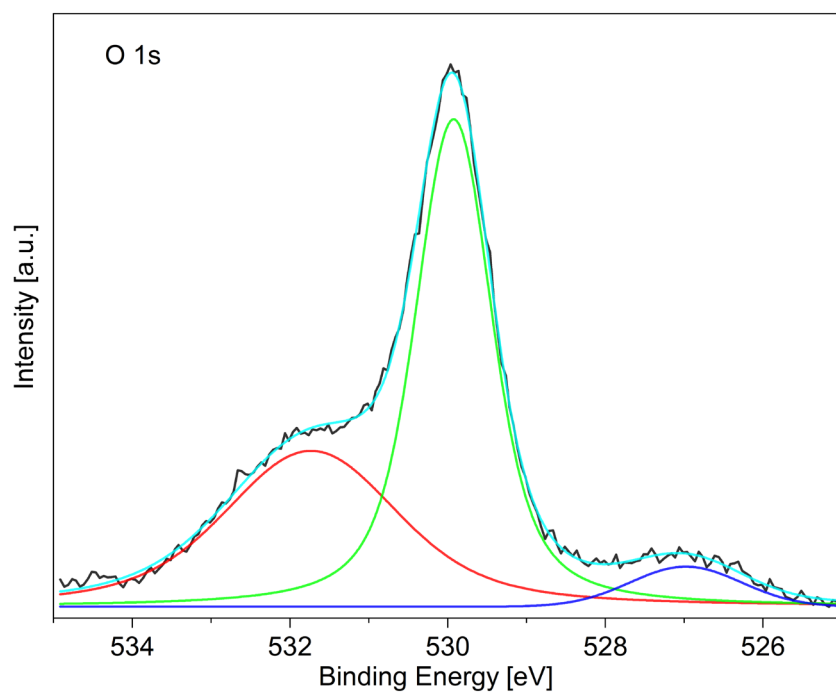

**Fig. S7** High-resolution XPS spectra of O 1s for Cu-NNN-TiO<sub>2</sub> (Black curve: measured spectrum; colored curves: fitted peaks).

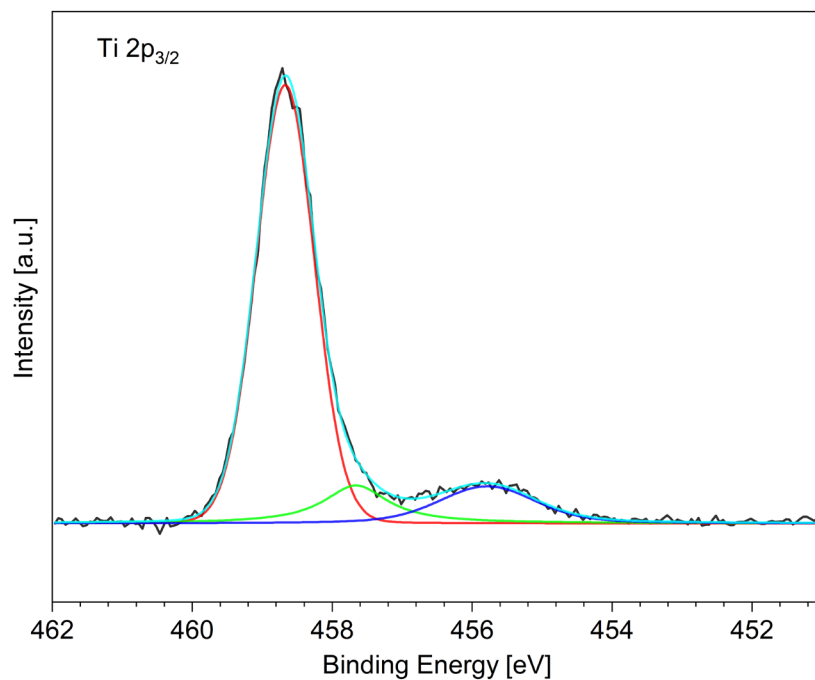

**Fig. S8** High-resolution XPS spectra of Ti 2p<sub>3/2</sub> for Cu-NNN-TiO<sub>2</sub> (Black curve: measured spectrum; colored curves: fitted peaks).

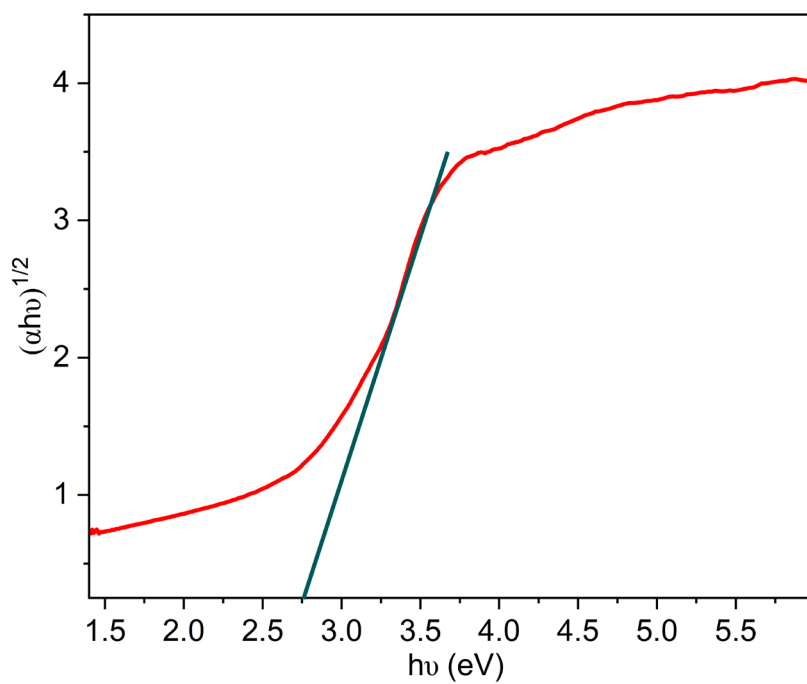

**Fig. S9** Tauc plot for Cu-NNN-TiO<sub>2</sub>.

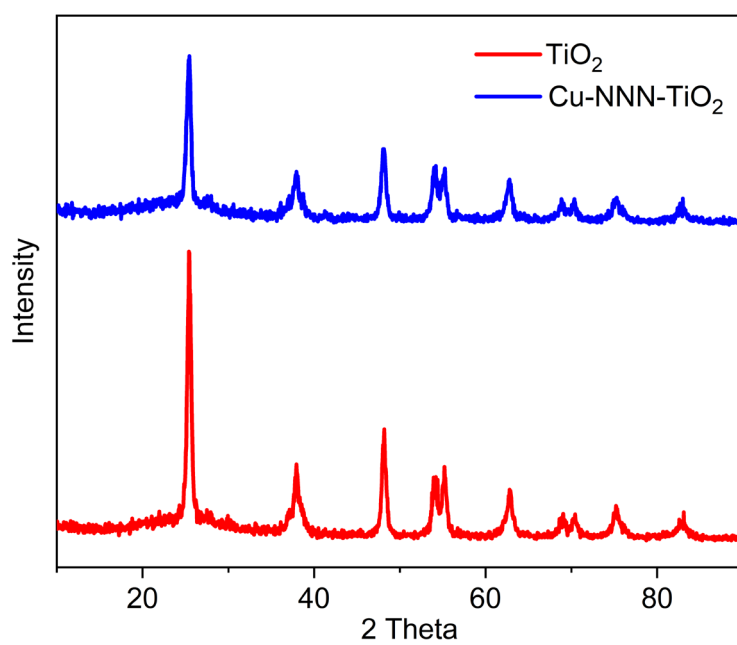

**Fig. S10** XRD pattern of TiO<sub>2</sub> and Cu-NNN-TiO<sub>2</sub>.

**Table S1** Summary of sorption parameters obtained for TiO<sub>2</sub> and Cu-NNN-TiO<sub>2</sub>

|                  | TiO <sub>2</sub>        | Cu-NNN-TiO <sub>2</sub> |
|------------------|-------------------------|-------------------------|
| <i>a</i> BET     | 64 m <sup>2</sup> /g    | 47 m <sup>2</sup> /g    |
| Pore volume      | 0.37 cm <sup>3</sup> /g | 0.22 cm <sup>3</sup> /g |
| Modal Pore width | 21.4 nm                 | 21.4 nm                 |
| Mean Pore width  | 22.8 nm                 | 19.2 nm                 |

**Table S2** Summary of consistency criteria derived from fitting BET surface areas on TiO<sub>2</sub> and Cu-NNN-TiO<sub>2</sub>

|                                                 | TiO <sub>2</sub> | Cu-NNN-TiO <sub>2</sub> |
|-------------------------------------------------|------------------|-------------------------|
| <i>P/P<sub>0</sub></i> range                    | 0.13–0.27        | 0.13–0.28               |
| <i>C</i>                                        | 42.59            | 29.44                   |
| <i>V<sub>m</sub></i> (cm <sup>3</sup> /g)       | 16.84            | 12.24                   |
| $\frac{1}{(\sqrt{C} + 1)}$                      | 0.133            | 0.156                   |
| <i>P/P<sub>0</sub></i> ( <i>V<sub>m</sub></i> ) | 0.132            | 0.156                   |
| <i>a</i> BET (m <sup>2</sup> /g)                | 64               | 47                      |
| <i>R</i>                                        | 0.9999           | 0.9999                  |
